# Supplementary material for: Cooperation Improvement in an Integrated Healthcare Network: A Social Network Analysis
Source: PubMed Central journal article supplement (PMC10312245; doi:10.5334/ijic.6519), 2023-06-26
Supplement: ijic-23-2-6519-s1.pdf [file ijic-23-2-6519-s1.pdf]

## Appendix.

### 1. Data transformation

We converted the claims database into an adjacency matrix for network analysis(37). The adjacency matrix is unipartite and represents the number of patients shared by pairs of physicians.

#### *Claims data*

|    |                |               |                       |                       |          |          |          |
|----|----------------|---------------|-----------------------|-----------------------|----------|----------|----------|
| 1) | <i>Patient</i> | <i>Doctor</i> | → (two – way table) → | <i>Patient/Doctor</i> | <i>A</i> | <i>B</i> | <i>C</i> |
|    | <i>x</i>       | <i>A</i>      |                       | <i>x</i>              | 1        | 1        | 0        |
|    | <i>x</i>       | <i>B</i>      |                       | <i>y</i>              | 1        | 0        | 1        |
|    | <i>y</i>       | <i>A</i>      |                       |                       |          |          |          |
|    | <i>y</i>       | <i>C</i>      |                       |                       |          |          |          |

***Bipartite A. matrix***

|    |                                            |               |          |          |          |
|----|--------------------------------------------|---------------|----------|----------|----------|
| 2) | <i>bipartite<sup>T</sup> * bipartite =</i> | <i>Doctor</i> | <i>A</i> | <i>B</i> | <i>C</i> |
|    |                                            | <i>A</i>      | 2        | 1        | 1        |
|    |                                            | <i>B</i>      | 1        | 1        | 0        |
|    |                                            | <i>C</i>      | 1        | 0        | 1        |

***Unipartite A. matrix***

### 2. Estimator at node level.

#### **Generalized Methods of Moments estimation.**

The standard GMM estimator (1) uses first difference of the regression equation to eliminate the individual effects. Next, lags of the dependent variable extended further back to the lag predicting the dynamic nature of the model are used as instruments for differenced lags of the dependent variable.

In practice, the standard GMM estimator consists in solving the unknown parameter vector ( $\theta$ ) by equating the theoretical moments with their empirical estimates. Where  $N$  is the size of a random sample,  $\theta$  is the unknown parameter vector and  $\theta_0$  is the true value of  $\theta$ , the model is defined when we consider the moment conditions  $m$  such that:

$$E(m(y_t; \theta_0)) = 0$$

Understanding  $\hat{m}(y_t, \theta)$  as the sample (empirical) estimate of  $E(m(y_t; \theta))$  based on  $N$  independent samples of  $y_t$ :

$$\hat{m}(y_t, \theta) = \left( \frac{1}{N} \sum_{t=1}^N m(y_t; \theta) \right)$$

So, the GMM consists in finding  $\hat{\theta}$  such that:

$$\hat{m}(y_t, \hat{\theta}) = 0$$

If the system is over-identified, meaning the length of the vector of moments conditions is larger than the length of the parameter vector, then the GMM estimator is defined by the minimization of the distance measure of  $\hat{m}(y_t, \theta)$ .

$$\hat{\theta} = \arg \min_{\theta} \hat{m}(y_t, \theta)' W \hat{m}(y_t, \theta)$$

Where  $W$  a positive definite weighting matrix. The two steps approach is used in the presence of heteroscedasticity and correlation to secure an optimal weighting matrix  $W(\hat{\theta})$ ; i.e., a consistent estimate of the inverse of the asymptotic covariance matrix of  $m(\hat{\theta})$ , by exploiting the residuals of the first step, that utilizes a suboptimal  $W$ .

$$W(\hat{\theta}) = \left( \frac{1}{N} \sum_{i=1}^N m_i(\hat{\theta}) m_i(\hat{\theta})' \right)^{-1}$$

$$\hat{\hat{\theta}} = \arg \min_{\theta} \hat{m}(y_t, \theta)' W(\hat{\theta}) \hat{m}(y_t, \theta)$$

The GMM system estimator is an alternative that corrects the bias generated by standard GMM in short, unbalanced panels with large number of units where the lagged variables are not good instruments of the variables in first differences. The method combines the standard set of transformed equations in first differences with an additional set of equations in levels. The first set of transformed equations uses the lag levels as instruments and the level equation uses the lagged first differences as instruments. Their validity is based on the following moment condition:

$$E[(FE_i + \varepsilon_{it})\Delta y_{i,t-z}] = 0 \text{ for } z = \{1,2\}$$

### 3. Assumption testing for dynamic panel estimations

#### 3.1 Stationarity of the node level indicators panel (Using tseries::adf.test in R):

| Augmented Dickey-Fuller Test<br>Alternative hypothesis: stationary |         |                       |                       |
|--------------------------------------------------------------------|---------|-----------------------|-----------------------|
| data                                                               | Degree  | EV-Centrality ranking | BE-Centrality ranking |
| Dickey-Fuller                                                      | -13.084 | -16.62                | -17.183               |
| Lag order                                                          | 2       | 1                     | 1                     |
| p-value                                                            | 0.01    | 0.01                  | 0.01                  |

#### 3.2 Multicollinearity in dynamic panel model (examined with car::vif in R).

| Variance Inflation factors<br>Rule of thumb: VIF over 5 is problematic |       |
|------------------------------------------------------------------------|-------|
| Charlson                                                               | 1.019 |
| Total number of patients                                               | 1.124 |
| Year                                                                   | 1.009 |
| Year*IP                                                                | 1.113 |

### 3.3 Normality in error distributions (using qqnorm in R)

For degree:

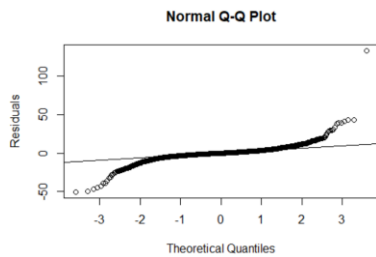

For EV-Centrality ranking:

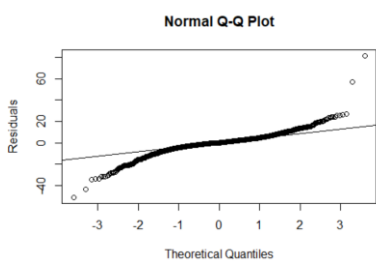

For BE-Centrality ranking:

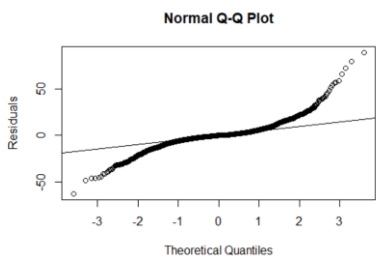

### 3.4 Heteroskedasticity (Using Breusch-Pagan test, lmtest::bptest in R)

| Breusch-Pagan test                         |           |                       |                       |
|--------------------------------------------|-----------|-----------------------|-----------------------|
| Alternative hypothesis: heteroskedasticity |           |                       |                       |
| data                                       | Degree    | EV-Centrality ranking | BE-Centrality ranking |
| BP                                         | 13484     | 5279.2                | 3360.2                |
| df                                         | 4         | 4                     | 4                     |
| p-value                                    | < 2.2e-16 | < 2.2e-16             | < 2.2e-16             |

We used robust standard errors(2) to deal with the presented heteroskedasticity.

#### 4. Sensitivity analysis for different threshold of shares patients to identify a meaningful professional relationship.

##### Model: Degree.

| Threshold                  | 9                                       | 3                                       | 6                                      | 12                                     | 15                                     |
|----------------------------|-----------------------------------------|-----------------------------------------|----------------------------------------|----------------------------------------|----------------------------------------|
|                            | Coefficients (SE)                       | Coefficients (SE)                       | Coefficients (SE)                      | Coefficients (SE)                      | Coefficients (SE)                      |
| lag(y, 1)                  | 0.52 ***<br>(0.12)                      | 0.78***<br>(0.09)                       | 0.60***<br>(0.10)                      | 0.51**<br>(0.16)                       | 0.51*<br>(0.22)                        |
| lag(y, 2)                  | 0.04<br>(0.14)                          | -0.07<br>(0.09)                         | 0.01<br>(0.12)                         | -0.02<br>(0.12)                        | -0.23<br>(0.21)                        |
| year                       | 1.70e-04<br>(5.39e-04)                  | 1.25e-03<br>(1.48e-03)                  | 8.63e-04<br>(8.80e-04)                 | 5.26e-04<br>(6.16e-04)                 | 3.87e-04<br>(6.68e-04)                 |
| year*IP                    | 1.64e-03<br>(9.08e-04)                  | 6.86e-04<br>(2.82e-03)                  | 2.38e-03*<br>(1.11e-03)                | 1.34e-03<br>(7.44e-04)                 | 1.17e-04<br>(1.08e-03)                 |
| Charlson Score             | 1.73**<br>(0.61)                        | 3.26**<br>(1.18)                        | 2.42**<br>(0.75)                       | 1.14*<br>(0.46)                        | 1.18*<br>(0.50)                        |
| Total N° patients          | 1.93e-02 *<br>(8.83e-03)                | 0.02<br>(0.01)                          | 0.02*<br>(8.80e-04)                    | 0.02*<br>(8.28e-03)                    | 0.03*<br>(0.01)                        |
| #Obs                       | 3067                                    | 3067                                    | 3067                                   | 2811                                   | 2676                                   |
| nodes                      | 602                                     | 602                                     | 602                                    | 559                                    | 537                                    |
| Length of res. vector      | 4493                                    | 3675                                    | 4493                                   | 4181                                   | 3346                                   |
| Hansen-Sargan test:        | chisq(68) 58.95 (p-value: 0.78)         | chisq(54) 69.06 (p-value: 0.08)         | chisq(65) 74.00 (p-value: 0.21)        | chisq(50) 42.35 (p-value: 0.77)        | chisq(26) 22.84 (p-value: 0.64)        |
| Autocorrelation test (1)   | normal -1.98 (p-value: 0.04)            | normal -4.33 (p-value: < 0.05)          | normal -2.38 (p-value: < 0.05)         | normal -1.99 (p-value: 0.05)           | normal -2.25 (p-value: 0.03)           |
| Autocorrelation test (2)   | normal 1.04 (p-value: 0.30)             | normal 1.46 (p-value: 0.15)             | normal 1.33 (p-value: 0.18)            | normal 1.57 (p-value: 0.12)            | normal 1.91 (p-value: 0.06)            |
| Wald test for coefficients | chisq(6) 7946.341 (p-value: < 2.22e-16) | chisq(6) 12609.57 (p-value: < 2.22e-16) | chisq(6) 8532.27 (p-value: < 2.22e-16) | chisq(6) 6525.30 (p-value: < 2.22e-16) | chisq(6) 3210.03 (p-value: < 2.22e-16) |
| R2                         | 0.89                                    | 0.91                                    | 0.89                                   | 0.89                                   | 0.88                                   |
| Instruments                | Lags 4:11                               | Lags 6:14                               | Lags 4:10                              | Lags 4:7                               | 6th lag                                |

Significance: \*\*\* = p < 0.001; \*\* = p < 0.01; \* = p < 0.05; · = p < 0.1; SE: Standard Errors

## Model: EV-centrality ranking

| Threshold                       | 9                                             | 3                                             | 6                                             | 12                                            | 15                                           |
|---------------------------------|-----------------------------------------------|-----------------------------------------------|-----------------------------------------------|-----------------------------------------------|----------------------------------------------|
|                                 | Coefficients (SE)                             | Coefficients (SE)                             | Coefficients (SE)                             | Coefficients (SE)                             | Coefficients (SE)                            |
| lag(y, 1)                       | 0.59***<br>(-0.12)                            | 0.69***<br>-0.11                              | 0.70***<br>(0.11)                             | 0.70***<br>(0.13)                             | 0.80***<br>(0.13)                            |
| lag(y, 2)                       |                                               |                                               |                                               | 0.16<br>(0.22)                                | 0.18<br>(0.24)                               |
| lag(y, 3)                       |                                               |                                               |                                               | -0.24<br>(0.28)                               | 3.58e-03<br>(0.26)                           |
| year                            | 3.96e-03*<br>(1.65e-03)                       | 2.44e-03<br>(1.31e-03)                        | 2.39e-03<br>(1.7e-03)                         | 3.58e-03<br>(2.07e-03)                        | 3.57e-03<br>(1.85e-03)                       |
| year*IP                         | 3.27e-03<br>1.82e-03                          | 2.02e-03<br>(1.72e-03)                        | 1.91e-03<br>(1.73e-03)                        | 2.59e-03 (p value<br>0.10)<br>(1.66e-03)      | 2.61e-03<br>(1.52e-03)                       |
| Charlson Score                  | 2.89***<br>(0.78)                             | 2.37**<br>(0.77)                              | 2.39**<br>(0.77)                              | 2.41*<br>(1.03)                               | 1.92*<br>(0.87)                              |
| Total N° patients               | 0.01<br>(5.38e-03)                            | 9.32e-03<br>(6.60e-03)                        | 0.01<br>6.76e-03                              | 0.01<br>(7.90e-03)                            | 8.51e-03<br>(6.23e-03)                       |
| #Obs                            | 3067                                          | 3067                                          | 3067                                          | 2811                                          | 2676                                         |
| nodes                           | 602                                           | 602                                           | 602                                           | 559                                           | 537                                          |
| Length of res. vector           | 3675                                          | 2406                                          | 2406                                          | 2285                                          | 2200                                         |
| Hansen-Sargan test:             | chisq(52) 67.45 (p-<br>value: 0.08)           | chisq(39) 34.37 (p-<br>value: 0.68)           | chisq(42) 34.10<br>(p-value: 0.80)            | chisq(34) 32.31<br>(p-value: 0.55)            | chisq(34) 28.02<br>(p-value: 0.76)           |
| Autocorrelation test (1)        | normal -5.28 (p-<br>value: 1.32e-07)          | normal -4.58 (p-<br>value: 4.61e-06)          | normal -4.61 (p-<br>value: 4.11e-06)          | normal -2.45 (p-<br>value: 0.01)              | normal -2.17 (p-<br>value: 0.03)             |
| Autocorrelation test (2)        | normal 1.89 (p-<br>value: 0.06)               | normal 0.84 (p-<br>value: 0.4)                | normal 0.91 (p-<br>value: 0.37)               | normal -0.37 (p-<br>value: 0.71)              | normal -0.77 (p-<br>value: 0.43)             |
| Wald test for coeffi-<br>cients | chisq(5) 16151.79<br>(p-value: <<br>2.22e-16) | chisq(5) 16093.52<br>(p-value: <<br>2.22e-16) | chisq(5) 15758.24<br>(p-value: <<br>2.22e-16) | chisq(7) 14187.57<br>(p-value: <<br>2.22e-16) | chisq(7) 14031.5<br>(p-value: <<br>2.22e-16) |
| R2                              | 0.92                                          |                                               | 0.93                                          | 0.91                                          | 0.91                                         |
| Instruments                     | Lags 6:11                                     | Lags 9,11,12,13                               | Lags 9,11,12,13                               | Lags 9:10                                     | Lags 9:10                                    |

Significance: \*\*\* =  $p < 0.001$ ; \*\* =  $p < 0.01$ ; \* =  $p < 0.05$ ; · =  $p < 0.1$ ; SE: Standard Errors

## Model: BE-centrality ranking

| Threshold                       | 9                                                 | 3                                                 | 6                                                 | 6                                                | 12                                                | 15                                                |
|---------------------------------|---------------------------------------------------|---------------------------------------------------|---------------------------------------------------|--------------------------------------------------|---------------------------------------------------|---------------------------------------------------|
|                                 | Coefficients<br>(SE)                              | Coefficients<br>(SE)                              | Coefficients<br>(SE)                              | Coefficients<br>(SE)                             | Coefficients<br>(SE)                              | Coefficients<br>(SE)                              |
| lag(y, 1)                       | 0.32 ***<br>(0.05)                                | 0.57***<br>(0.09)                                 | 0.37**<br>(0.06)                                  | 0.37*<br>(0.17)                                  | 0.41***<br>(0.08)                                 | 0.46***<br>(0.07)                                 |
| lag(y, 2)                       |                                                   | 0.20**<br>(0.07)                                  |                                                   |                                                  | 0.14*<br>(0.06)                                   |                                                   |
| year                            | 1.05e-02***<br>(1.21e-03)                         | 2.38e-03<br>(1.54e-03)                            | 9.08e-03***<br>(1.41e-03)                         | 8.86e-03**<br>(2.76e-03)                         | 6.09e-03**<br>(1.91e-03)                          | 7.22e-03***<br>(1.31e-03)                         |
| year*IP                         | 4.56e-03***<br>(7.94e-04)                         | 1.91e-03*<br>(9.10e-04)                           | 5.17e-03***<br>(1.22e-03)                         | 4.34e-03(p<br>value 0.12)<br>(2.81e-01)          | 2.21e-03**<br>(8.51e-04)                          | 2.69e-03***<br>(8.13e-04)                         |
| Charlson Score                  | 2.31***<br>(0.61)                                 | 1.32*<br>(0.54)                                   | 2.36***<br>(0.71)                                 | 2.71*<br>(1.11)                                  | 1.80**<br>(0.56)                                  | 1.77**<br>(0.64)                                  |
| Total N° patients               | 1.48e-02***<br>(2.01e-03)                         | 6.02e-03<br>(2.48e-03)                            | 0.01***<br>(2.57e-03)                             | 0.01·<br>(7.71e-03)                              | 0.01**<br>(3.78e-03)                              | 0.01***<br>(1.798e-03)                            |
| #Obs                            | 3067                                              | 3067                                              | 3067                                              | 3067                                             | 2811                                              | 2676                                              |
| nodes                           | 602                                               | 602                                               | 602                                               | 602                                              | 559                                               | 537                                               |
| Length of res. vector           | 4894                                              | 4100                                              | 4894                                              | 1525                                             | 4499                                              | 4479                                              |
| Hansen-Sargan test:             | chisq(81)<br>74.91 (p-<br>value: 0.67)            | chisq(56) 58.83<br>(p-value:<br>0.37)             | chisq(81)<br>102.25 (p-<br>value: 0.06)           | chisq(45)<br>35.50 (p-<br>value: 0.84)           | chisq(44)<br>53.78 (p-<br>value: 0.15)            | chisq(87)<br>101.99 (p-<br>value: 0.13)           |
| Autocorrelation test (1)        | normal -6.15<br>(p-value:<br>7.89e-10)            | normal -3.93<br>(p-value:<br>8.39e-05)            | normal -4.74<br>(p-value:<br>2.11e-06)            | normal -2.84<br>(p-value:<br>4.50e-03)           | normal -3.69<br>(p-value:<br>2.28e-04)            | normal -4.57<br>(p-value:<br>4.89e-06)            |
| Autocorrelation test (2)        | normal 0.91 (p-<br>value: 0.37)                   | normal -0.61<br>(p-value:<br>0.54)                | normal 0.78 (p-<br>value: 0.43)                   | normal 1.23 (p-<br>value: 0.22)                  | normal 0.47 (p-<br>value: 0.64)                   | normal 0.54<br>(p-value:<br>0.59)                 |
| Wald test for coeffi-<br>cients | chisq(5)<br>10526.45 (p-<br>value: <<br>2.22e-16) | chisq(6)<br>28368.16 (p-<br>value: <<br>2.22e-16) | chisq(5)<br>9814.532 (p-<br>value: <<br>2.22e-16) | chisq(5)<br>4208.49 (p-<br>value: <<br>2.22e-16) | chisq(6)<br>18987.58 (p-<br>value: <<br>2.22e-16) | chisq(5)<br>10654.09 (p-<br>value: <<br>2.22e-16) |
| R2                              | 0.83                                              | 0.89                                              | 0.84                                              | 0.87                                             | 0.84                                              | 0.84                                              |
| Instruments                     | Lags 3:14                                         | Lags 5:10                                         | Lags 3, 11:14                                     | Lags 11:14                                       | Lags 3, 5                                         | Lags 2, 4, 10                                     |

Significance: \*\*\* =  $p < 0.001$ ; \*\* =  $p < 0.01$ ; \* =  $p < 0.05$ ; · =  $p < 0.1$ ; SE: Standard Errors

## References

1. **Arellano M, Bond S.** Some Tests of Specification for Panel Data: Monte Carlo Evidence and an Application to Employment Equations. *Rev Econ Stud.* 1991 Apr; 58(2): 277. DOI: <https://doi.org/10.2307/2297968>
2. **Freedman DA.** On The So-Called “Huber Sandwich Estimator” and “Robust Standard Errors.” *Am Stat.* 2006 Nov; 60(4): 299–302. DOI: <https://doi.org/10.1198/000313006X152207>
